# Supplementary material
Source: PubMed Central journal article supplement (PMC10300686)
Supplement: jama-e237827-s004.pdf [file jama-e237827-s004.pdf]

\*First name, last name, and suffix (if applicable) are required and will appear in PubMed.

| <b>*Group Name(s): ARAMIS Investigators</b> |                   |                              |                  |                                                                                                                  |                                          |                                                         |                                                                                            |
|---------------------------------------------|-------------------|------------------------------|------------------|------------------------------------------------------------------------------------------------------------------|------------------------------------------|---------------------------------------------------------|--------------------------------------------------------------------------------------------|
| <b>*First Name and Middle Initial(s)</b>    | <b>*Last Name</b> | <b>*Suffix (eg, Jr, III)</b> | Academic Degrees | Institution                                                                                                      | Location (city, state/province, country) | Role or Contribution, eg, chair, principal investigator | Group (if more than 1 Group listed in the byline) and/or Subgroup (eg, Steering Committee) |
| Zhuo                                        | Gao               |                              | BSM              | Department of Neurology, Dalian Jiuzhou Shiji Hospital                                                           | Dalian, Liaoning, China                  | principal investigator                                  |                                                                                            |
| Hang                                        | Zhao              |                              | BSM              | Department of Neurology, General Hospital of Benxi Iron & Steel Industry Group of Liaoning Health Industry Group | Benxi, Liaoning, China                   | principal investigator                                  |                                                                                            |
| Xiao-Dong                                   | Liu               |                              | MM               | Tonghua Cerebrovascular Hospital                                                                                 | Tonghua, Jilin, China                    | principal investigator                                  |                                                                                            |
| Xue-Wen                                     | Liu               |                              | MD               | Department of Neurology, The First Affiliated Hospital of Jinzhou Medical University                             | Jinzhou, Liaoning, China                 | principal investigator                                  |                                                                                            |
| Li-Hong                                     | Zhang             |                              | BSM              | Department of Neurology, Shenyang 739 Hospital                                                                   | Shenyang, Liaoning, China                | principal investigator                                  |                                                                                            |
| Ling                                        | Zhang             |                              | BSM              | Department of Neurology, Dengta Central Hospital                                                                 | Dengta, Liaoning, China                  | principal investigator                                  |                                                                                            |
| Li                                          | Li                |                              | BSM              | Department of Neurology, Dalian Liaoyu Hospital                                                                  | Dalian, Liaoning, China                  | principal investigator                                  |                                                                                            |
| Jia-Dong                                    | Zhang             |                              | MM               | Department of Neurology, Harbin First Hospital                                                                   | Harbin, Heilongjiang, China              | principal investigator                                  |                                                                                            |
| Xin-Qiang                                   | Wang              |                              | BSM              | Department of Neurology, Liaocheng Second People's Hospital                                                      | Liaocheng, Shandong, China               | principal investigator                                  |                                                                                            |
| Wen-Hai                                     | Yang              |                              | MM               | Department of Neurology, The Third Affiliated Hospital of Jinzhou Medical University                             | Jinzhou, Liaoning, China                 | principal investigator                                  |                                                                                            |
| Shi-Mei                                     | Geng              |                              | BSM              | Department of Neurology, Beipiao Central Hospital                                                                | Beipiao, Liaoning, China                 | principal investigator                                  |                                                                                            |

Supplemental Online Content: Nonauthor Collaborators

\*First name, last name, and suffix (if applicable) are required and will appear in PubMed.

| <b>*First Name and Middle Initial(s)</b> | <b>*Last Name</b> | <b>*Suffix (eg, Jr, III)</b> | Academic Degrees | Institution                                                                          | Location (city, state/province, country) | Role or Contribution, eg, chair, principal investigator | Group (if more than 1 Group listed in the byline) and/or Subgroup (eg, Steering Committee) |
|------------------------------------------|-------------------|------------------------------|------------------|--------------------------------------------------------------------------------------|------------------------------------------|---------------------------------------------------------|--------------------------------------------------------------------------------------------|
| Lian-Qiang                               | Wang              |                              | BSM              | Department of Neurology, Liaoyang County Stroke Hospital                             | Liaoyang, Liaoning, China                | principal investigator                                  |                                                                                            |
| Run-Hui                                  | Li                |                              | MM               | Department of Neurology, The Affiliated Central Hospital of Shenyang Medical College | Shenyang, Liaoning, China                | principal investigator                                  |                                                                                            |
