# Supplementary material
Source: PubMed Central journal article supplement (PMC10300686)
Supplement: jama-e237827-s005.pdf [file jama-e237827-s005.pdf]

## **Data Sharing Statement**

### **Data**

**Data available:** No
